# Supplementary material for: TiO2@MOF-919(Fe–Cu) as a sorbent for the extraction of benzoylurea pesticides from irrigation water and fruit juices
Source: Royal Society of Chemistry journal article supplement (doi:10.1039/d2ay00842d), 2022-01-01
Supplement: d2ay00842d1.pdf [file d2ay00842d1.pdf]

Electronic Supplementary Material (ESI) for Analytical Methods.

This journal is © The Royal Society of Chemistry 2022

**TiO<sub>2</sub>@MOF-919(Fe-Cu) as a sorbent for extraction of benzoylurea pesticides  
from irrigation water and fruit juices**

Ling Mei<sup>a,b</sup>, Tiantian Si<sup>a,b</sup>, Shuai Wang<sup>a</sup>, Jie Zhu<sup>c</sup>, Hao Tang<sup>c,d\*</sup>, Xiaojing Liang<sup>a\*</sup>

<sup>a</sup> CAS Key Laboratory of Chemistry of Northwestern Plant Resources and Key  
Laboratory for Natural Medicine of Gansu Province, Lanzhou Institute of Chemical  
Physics, Chinese Academy of Sciences, Lanzhou 730000, China

<sup>b</sup> University of Chinese Academy of Sciences, Beijing 100049, China

<sup>c</sup> College of pharmacy, Gansu University of Chinese Medicine, Lanzhou 730000,  
China

<sup>d</sup> Department of Pharmacy, Gansu Provincial Hospital, Lanzhou 730000, China

**E-mail:** [xjliang@licp.cas.cn](mailto:xjliang@licp.cas.cn) (Xiaojing Liang); [naomitang@hotmail.com](mailto:naomitang@hotmail.com) (Hao Tang)

**Phone:** + 86 931 4968266

**Fax:** +86 931 4968013

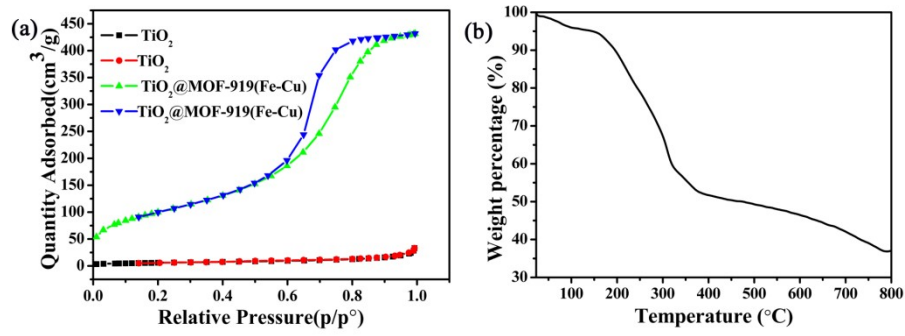

**Fig. S1** Characterization of the prepared materials: (a) The N<sub>2</sub> adsorption–desorption isotherms of TiO<sub>2</sub>, TiO<sub>2</sub>@MOF–919(Fe-Cu); (b)TGA spectra of TiO<sub>2</sub>@MOF–919(Fe-Cu).

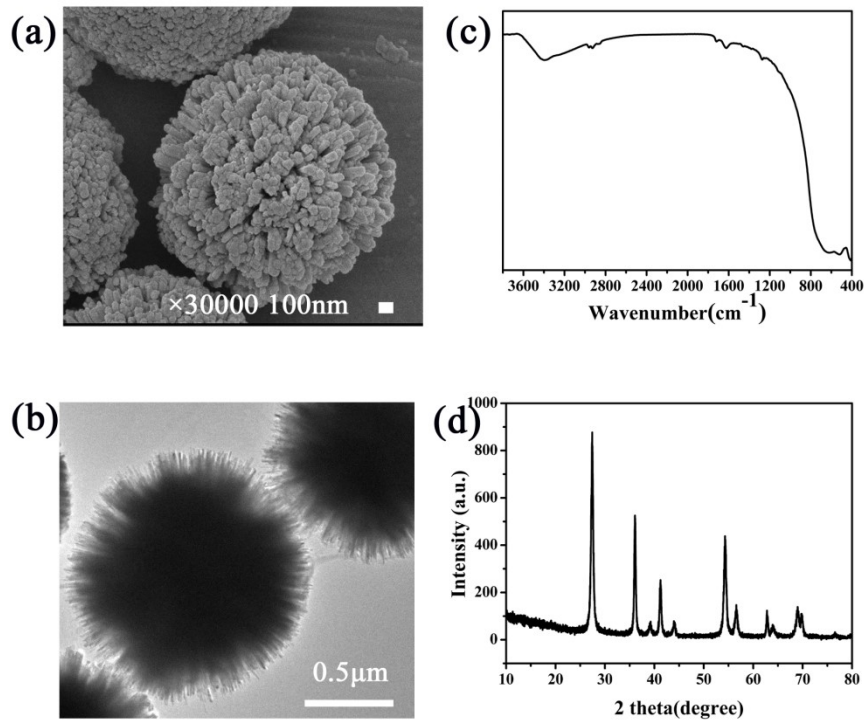

**Fig. S2** Characterization of 3D radial TiO<sub>2</sub> bare spheres: (a) SEM spectra; (b) TEM spectra; (c) FTIR spectra; (d) XRD spectra.

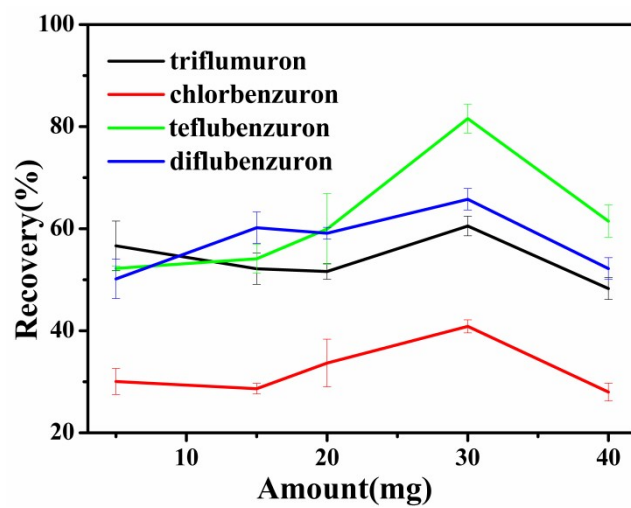

**Fig. S3** Effect of the amount of 3D radial TiO<sub>2</sub> bare spheres.

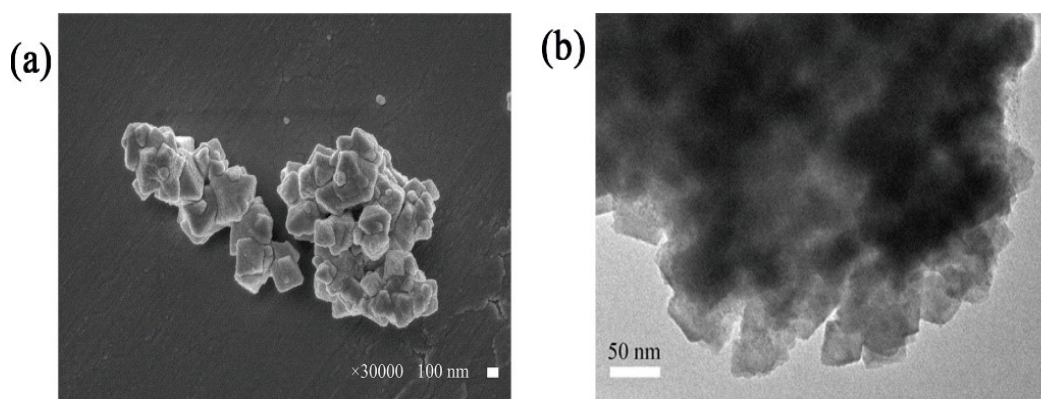

**Fig. S4** Characterization of MOF-919(Fe-Cu): (a) SEM spectra; (b) TEM spectra.

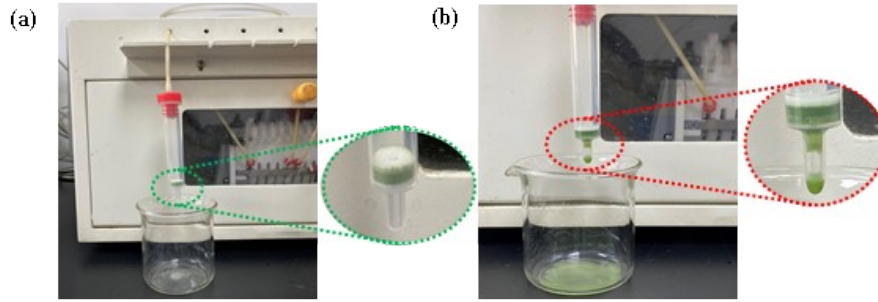

**Fig. S5** The state of  $\text{TiO}_2@\text{MOF-919}(\text{Fe-Cu})$  before and after loading.

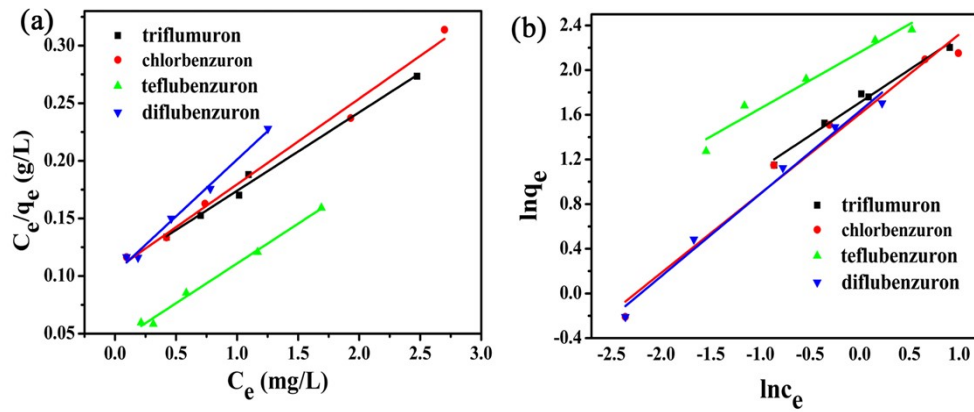

**Fig. S6** (a) Langmuir plots and (b) Freundlich plots for the adsorption of BUs on  $\text{TiO}_2@\text{MOF-919}(\text{Fe-Cu})$ .

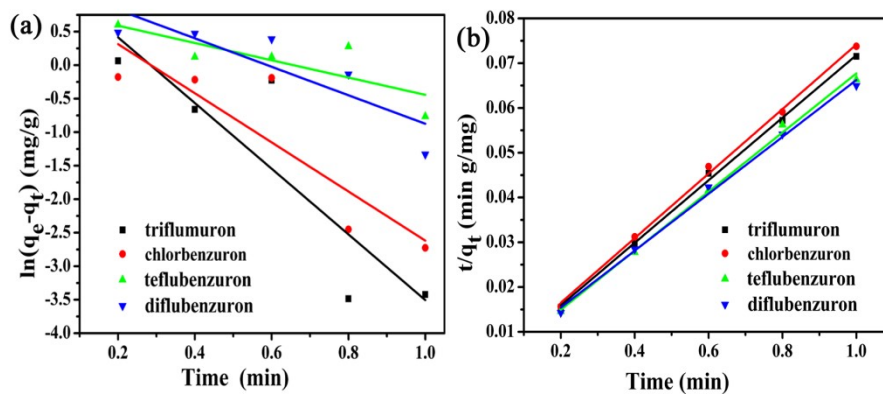

**Fig. S7** The adsorption kinetic models of BUs on TiO<sub>2</sub>@MOF-919(Fe-Cu). (a) pseudo-first-order model; (b) pseudo-second-order model.

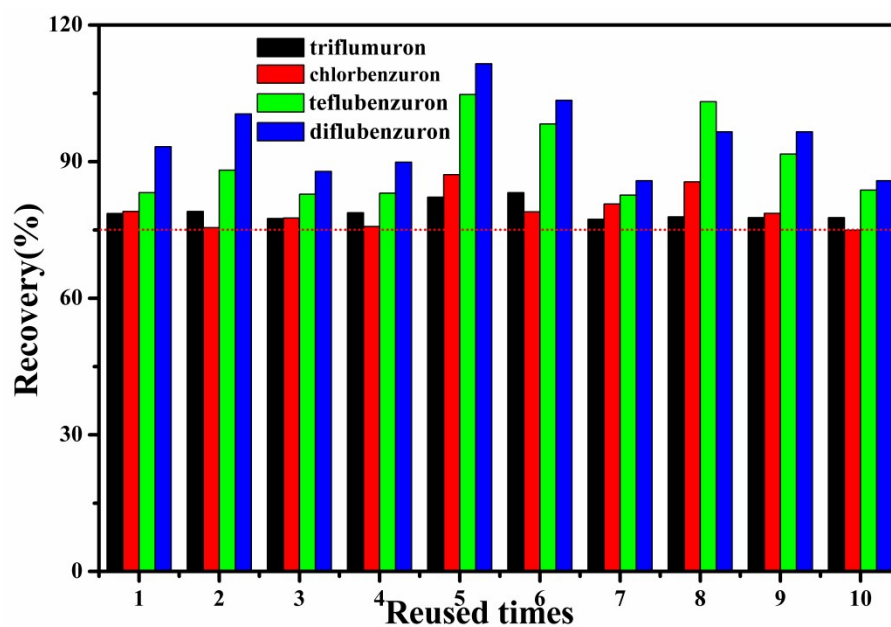

**Fig. S8** The reusability of TiO<sub>2</sub>@MOF-919(Fe-Cu) on adsorption of BUs.

**Table S1** The fitting results of Langmuir model and Freundlich model.

| Analyte       | Langmuir model                  |                                 |        | □ | Freundlich model |                                 |       |
|---------------|---------------------------------|---------------------------------|--------|---|------------------|---------------------------------|-------|
|               | $q_m$<br>( $\text{mg g}^{-1}$ ) | $K_L$<br>( $\text{L mg}^{-1}$ ) | $R^2$  |   | □                | $K_F$<br>( $\text{mg g}^{-1}$ ) | $1/n$ |
| triflumuron   | 14.68                           | 0.643                           | 0.9927 |   | 1.80             | 0.589                           | 0.983 |
| chlorbenzuron | 13.46                           | 0.706                           | 0.9914 |   | 2.04             | 1.601                           | 0.977 |
| teflubenzuron | 14.49                           | 1.647                           | 0.9934 |   | 1.65             | 2.160                           | 0.963 |
| diflubenzuron | 10.14                           | 0.962                           | 0.9922 | □ | 2.10             | 1.633                           | 0.987 |

**Table S2** The fitting results of adsorption kinetics for BUs.

| Analyte       | Pseudo-first-order kinetic     |                                 |       | □ | Pseudo-second-order kinetic |                                                 |                                 |
|---------------|--------------------------------|---------------------------------|-------|---|-----------------------------|-------------------------------------------------|---------------------------------|
|               | $k_1$<br>( $\text{min}^{-1}$ ) | $q_e$<br>( $\text{mg g}^{-1}$ ) | $R^2$ |   | □                           | $k_2$<br>( $\text{g mg}^{-1} \text{min}^{-1}$ ) | $q_e$<br>( $\text{mg g}^{-1}$ ) |
| triflumuron   | 4.901                          | 4.035                           | 0.774 |   | 2.562                       | 14.306                                          | 0.998                           |
| chlorbenzuron | 3.366                          | 2.850                           | 0.777 |   | 2.475                       | 13.870                                          | 0.998                           |
| teflubenzuron | 1.338                          | 2.346                           | 0.778 |   | 2.390                       | 15.244                                          | 0.999                           |
| diflubenzuron | 2.125                          | 3.493                           | 0.752 | □ | 1.493                       | 15.748                                          | 0.996                           |

**Table S3** Analytical data for the determination of BUs by the method.

| Analytes      | Linear range ( $\mu\text{g L}^{-1}$ ) | Calibration curve      | Correlation coefficient ( $R^2$ ) | Limits of detection ( $\mu\text{g L}^{-1}$ ) | RSDs (%) (n = 7) |          |
|---------------|---------------------------------------|------------------------|-----------------------------------|----------------------------------------------|------------------|----------|
|               |                                       |                        |                                   |                                              | Intraday         | Interday |
| triflumuron   | 1-400                                 | $y = 0.5338x - 2.0326$ | 0.9994                            | 0.53                                         | 1.78             | 4.27     |
| chlorbenzuron | 1-400                                 | $y = 0.5599x + 2.1653$ | 0.9995                            | 0.56                                         | 3.24             | 5.08     |
| teflubenzuron | 1-400                                 | $y = 0.4826x - 0.7781$ | 0.9997                            | 0.48                                         | 2.36             | 4.50     |
| diflubenzuron | 1-400                                 | $y = 0.399x + 0.2646$  | 0.9998                            | 0.40                                         | 2.21             | 4.07     |

**Table S4** Comparison of the methods for the determination of BUs.

| Method             | Extraction sorbent                                     | Sample               | Reused times | Analytical ranges ( $\mu\text{g L}^{-1}$ ) | LODs ( $\mu\text{g L}^{-1}$ ) | Recovery (%) | Ref       |
|--------------------|--------------------------------------------------------|----------------------|--------------|--------------------------------------------|-------------------------------|--------------|-----------|
| MSPE <sup>a</sup>  | ATP@Fe <sub>3</sub> O <sub>4</sub> @ZIF-8 <sup>b</sup> | Tea                  | 5            | 2.5–500                                    | 0.36–0.66                     | 78.9–114.0   | [1]       |
| DSPE <sup>c</sup>  | [C <sub>16</sub> MIM]Br-AL <sup>d</sup>                | Water, tea beverages | 1            | 1–500                                      | 0.14–0.23                     | 72.8–89.3    | [27]      |
| DLLME <sup>e</sup> | [N <sub>8881</sub> ][PF <sub>6</sub> ]                 | Water, tea beverages | /            | 2–500                                      | 0.29–0.59                     | 85.93–90.52  | [28]      |
| SPE                | TiO <sub>2</sub> @MOF-919(Fe)                          | Tap water, juices    | 10           | 1–400                                      | 0.40–0.56                     | 72.3–108.4   | This work |

<sup>a</sup>MSPE: magnetic solid-phase extraction ; <sup>b</sup>ATP@Fe<sub>3</sub>O<sub>4</sub>@ZIF-8: attapulgite-modified magnetic metal-organic frameworks; <sup>c</sup>DSPE: dispersive solid-phase adsorbent; <sup>d</sup>[C<sub>16</sub>MIM]Br-AL: ionic liquid 1-hexadecyl-3-methylimidazolium-alkalized luffa sponge fibers bromide-alkalized luffa sponge fibers; <sup>e</sup>DLLME: dispersive liquid-liquid microextraction
